# Supplementary material for: Multicenter Technical Validation of 30 Rapid Antigen Tests for the Detection of SARS-CoV-2 (VALIDATE)
Source: MDPI journal article supplement (doi:10.3390/microorganisms9122589), 2021-12-15
Supplement: s1 [file s1]

## Supplementary material

### Supplementary tables

**Supplementary Table S1.** All antigen assays evaluated between 7 November 2020 and 23 February 2021 in alphabetic order according to the manufacturer's name.

| Manufacturer                     | Name of antigen assay                                     | Manufacturer's reference | Country of production | Certification | Target                          | Type of test                                             |
|----------------------------------|-----------------------------------------------------------|--------------------------|-----------------------|---------------|---------------------------------|----------------------------------------------------------|
| Acro Biotech                     | Acro COVID-19 Antigen test                                | INCP-ACO502              | USA                   | CE            | Nucleo-capsid and spike protein | Qualitative membrane-based immunoassay                   |
| AMEDA Labordiagnostic            | AMP Rapid Test SARS-CoV-2 Ag                              | RT2952-S                 | Austria               | CE            | Nucleo-capsid protein           | Immunochromatographic membrane assay with colloidal gold |
| Becton Dickinson                 | The BD Veritor™ System                                    | 256082                   | USA                   | CE-IVD        | Nucleo-capsid protein           | Immunochromatographic membrane assay                     |
| Beijing Hotgen Biotech Co., Ltd. | Novel Coronavirus 2019-nCoV Antigen Test (Colloidal Gold) | 76749                    | China                 | CE            | Not specified                   | Colloidal Gold Immunochromatographic assay               |
| BioNote, Co., LTD.               | NowCheck® COVID-19 Ag Test                                | RG1901DG (NP)            | Korea                 | CE            | Not specified                   | Rapid chromatographic immunoassay                        |
| BIOSYNEX Swiss                   | Biosynex COVID-19 Ag BSS^ (colloidal gold)                | SW40006                  | Switzerland           | CE-IVD        | Nucleo-capsid protein           | Colloidal gold immunochromatographic membrane assay      |
| BIOSYNEX Swiss                   | Biosnyex COVID-19 Ag+ BSS° (agglutin)                     | N/A                      | Switzerland           | N/A           | N/A                             | N/A                                                      |
| Biozek Medical                   | COVID-19 Antigen Rapid Test Cassette                      | BCOV-502                 | Netherlands           | CE-IVD        | Not specified                   | Qualitative membrane-based immunoassay                   |
| GenBody Inc.                     | GenBody Covid-19 Ag                                       | COVAG025                 | Korea                 | CE-IVD        | Nucleo-capsid                   | Colloidal Gold                                           |

|                              |                                  |                                                              |       |        |                               |                                                          |
|------------------------------|----------------------------------|--------------------------------------------------------------|-------|--------|-------------------------------|----------------------------------------------------------|
| Green Medical Corp.          | Cross Science Genedia W          | COVID-19 Ag§ 643G                                            | Korea | CE-IVD | protein                       | Immunochromatographic assay                              |
| Guangzhou Wondfo Co.         | Wondfo Biotech                   | SARS-CoV-2 W196 Antigen Test                                 | China | CE     | Not specified                 | Immunochromatographic membrane assay                     |
| Hangzhou Clongene Co., Ltd.  | CLUNGENE® Rapid Antigen Cassette | COVID-19 Test ICOV5002                                       | China | CE     | Nucleo-capsid protein         | Qualitative Lateral Flow Immunoassay                     |
| HANGZHOU LYSUN Biotechnology | LYSUN Antigen                    | SARS-CoV-2 COV-201                                           | China | CE-IVD | Not specified                 | Lateral flow immunoassay                                 |
| Hangzhou Tech Co.            | Realy                            | REALY antigen test K511416D                                  | China | CE     | Not specified                 | Double antibody sandwich method with colloidal gold      |
| Healgen Limited Company      | Scientific Liability             | CLINITEST®, Rapid COVID-19 Antigen Test+ GCCOV-502a          | USA   | CE-IVD | Not specified                 | Immunochromatographic membrane assay with colloidal gold |
| Humasis                      | Humasis                          | COVID-19 Ag Test N/A                                         | Korea | CE-IVD | Nucleo-capsid and RBD protein | Immunochromatographic membrane assay with colloidal gold |
| Lansion Biotechnology Co.    | Lansionbio®                      | COVID-19 Antigen Test Kit (Dry Fluorescence Immunoassay) N/A | China | CE-IVD | Nucleocapsid protein          | Dry fluorescence immunoassay                             |

|                                       |                                                                     |                             |             |        |                       |                                                                                         |
|---------------------------------------|---------------------------------------------------------------------|-----------------------------|-------------|--------|-----------------------|-----------------------------------------------------------------------------------------|
| Lepu Medical Zechology Co., Ltd.      | SARS-CoV-2 Antigen Rapid Test (Colloidal Gold Immunochromatography) | N/A                         | China       | CE-IVD | Nucleo-capsid protein | Colloidal Gold Immunochromatographic assay                                              |
| LumiraDx AB                           | LumiraDx SARS-CoV-2 Ag                                              | SPEC-32312 R5 ART-00571 R11 | Sweden      | CE-IVD | Nucleo-capsid protein | Rapid microfluidic immunofluorescence assay                                             |
| MaiMed GmbH                           | MEDsan® SARS-CoV-2 Antigen Rapid Test                               | 76748                       | Germany     | CE-IVD | Not specified         | Solid-phase immunochromatography test                                                   |
| MP Biomedicals GmbH                   | MP COVID-19 Antigen Rapid Test                                      | 07AG6020B                   | Germany     | CE-IVD | Not specified         | Double antibody sandwich immunochromatographic lateral flow device                      |
| Newgene Hangzhou Bioengineering       | COVID-19 Antigen Detection Kit                                      | 9901-NCOV-01G               | China       | CE-IVD | Nucleo-capsid protein | Qualitative membrane-based immunoassay                                                  |
| Precision Biosensor, Inc.             | Exdia COVID-19 Ag                                                   | PR-FC13                     | Korea       | CE     | Nucleo-capsid protein | Time-resolved fluorescence immuno-chromatography assay                                  |
| PRIMA Lab SA                          | COVID-19 Antigen Rapid Test                                         | N/A                         | Switzerland | CE-IVD | Not specified         | Immunochromatographic membrane assay                                                    |
| Shenzhen Microprofit Biotech Co.      | Fluorecare® SARS-CoV-2 Spike Protein Test Kit                       | MF-60 and MF-63             | China       | CE-IVD | Spike protein         | Colloidal Gold Chromatographic Immunoassay (MF-60) and Fluorescence Immunoassay (MF-63) |
| Sugentech Inc.                        | SGTi-flex COVID-19 Ag                                               | N/A                         | Korea       | CE     | Not specified         | Gold nanoparticle-based Immunochromatographic assay                                     |
| VivaCheck Biotech (Hangzhou) Co., Ltd | VivaDiag™, SARS-CoV-2 Rapid Ag Test                                 | VCD05-01-013                | China       | CE-IVD | Nucleo-capsid protein | Lateral flow immunoassay                                                                |

|                                         |                                   |          |             |        |                       |                                            |
|-----------------------------------------|-----------------------------------|----------|-------------|--------|-----------------------|--------------------------------------------|
| Willi Fox                               | Willi Fox COVID-19 Antigen Test®  | 7771417  | Switzerland | CE     | Nucleo-capsid protein | Qualitative membrane-based immunoassay     |
| Wuhan UNscience Biotechnology Co., Ltd. | SARS-CoV-2 Antigen Rapid Test Kit | N/A      | China       | CE-IVD | N/A                   | Colloidal gold Immunoassay                 |
| Xiamen Boson Biotech Co., Ltd.          | Medicovid-AG® Test                | 16923451 | Germany     | CE-IVD | Nucleo-capsid protein | Colloidal Chromatographic Immunoassay Gold |

CE: conformity to the European Directive 98/79/EC; IVD: conformity to the In Vitro Diagnostics directive of the Federal Food, Drug, and Cosmetic Act; N/A: not available.

**Supplementary Table S2.** List of samples used for cross-reactivity validation. Each PCR was performed in a technical triplicate and the quantification was calculated from the mean value.

| Number    | Material | Replicate 1 Ct-value | Replicate 2 Ct-value | Replicate 3 Ct-value | Copies/mL | Log <sub>10</sub> Copies/mL |
|-----------|----------|----------------------|----------------------|----------------------|-----------|-----------------------------|
| RV-NEG-6  | CoV 229  | 25.3                 | 25.5                 | 25.7                 | 110200    | 5.0                         |
| RV-NEG-7  | CoV 229  | 24.9                 | 25.2                 | 25.7                 | 105700    | 5.0                         |
| RV-NEG-8  | CoV 229  | 25.1                 | 26.4                 | 26.4                 | 73700     | 4.9                         |
| RV-NEG-9  | CoV HKU1 | 41.4                 | neg                  | neg                  | 100       | 2.0                         |
| RV-NEG-10 | CoV HKU1 | 29.9                 | 30.1                 | 30.8                 | 6400      | 3.8                         |
| RV-NEG-11 | CoV HKU1 | 39.3                 | 39.6                 | 41.1                 | 100       | 2.0                         |
| RV-NEG-12 | CoV OC43 | 21.7                 | 21.9                 | 22.1                 | 2171000   | 6.3                         |
| RV-NEG-13 | CoV OC43 | 25.3                 | 25.7                 | 25.7                 | 187500    | 5.3                         |
| RV-NEG-14 | CoV OC43 | 23.0                 | 23.4                 | 23.8                 | 815400    | 5.9                         |
| RV-NEG-15 | CoV NL63 | 21.5                 | 21.8                 | 22.0                 | 4756100   | 6.7                         |

|           |                   |      |      |      |         |     |
|-----------|-------------------|------|------|------|---------|-----|
| RV-NEG-16 | CoV NL63          | 24.6 | 24.9 | 26.1 | 472400  | 5.7 |
| RV-NEG-17 | CoV NL63          | 25.3 | 25.5 | 25.5 | 367800  | 5.6 |
| RV-NEG-18 | Parainfluenza 1   | 32.2 | 32.7 | 33.0 | 4900    | 3.7 |
| RV-NEG-19 | Parainfluenza 1   | 27.0 | 27.3 | 27.9 | 133900  | 5.1 |
| RV-NEG-20 | Parainfluenza 1   | 22.9 | 23.2 | 23.5 | 182300  | 5.3 |
| RV-NEG-21 | Parainfluenza 2   | 26.8 | 27.2 | 27.6 | 172400  | 5.2 |
| RV-NEG-22 | Parainfluenza 2   | 27.5 | 27.6 | 28.0 | 120400  | 5.1 |
| RV-NEG-23 | Parainfluenza 2   | 25.1 | 25.7 | 25.7 | 555900  | 5.7 |
| RV-NEG-24 | Parainfluenza 3   | 30.3 | 31.1 | 31.1 | 9700    | 4.0 |
| RV-NEG-25 | Parainfluenza 3   | 24.3 | 24.3 | 24.3 | 684100  | 5.8 |
| RV-NEG-26 | Parainfluenza 3   | 26.5 | 26.9 | 27.2 | 131100  | 5.1 |
| RV-NEG-27 | Parainfluenza 4   | 23.3 | 23.6 | 23.6 | 433200  | 5.6 |
| RV-NEG-28 | Parainfluenza 4   | 25.9 | 26.3 | 26.5 | 93300   | 5.0 |
| RV-NEG-29 | Parainfluenza 4   | 27.6 | 27.7 | 27.2 | 53900   | 4.7 |
| RV-NEG-30 | Rhino/Enterovirus | neg  | neg  | neg  | neg     | neg |
| RV-NEG-31 | Rhino/Enterovirus | neg  | neg  | neg  | neg     | neg |
| RV-NEG-32 | Rhino/Enterovirus | neg  | neg  | neg  | neg     | neg |
| RV-NEG-33 | Rhino/Enterovirus | neg  | neg  | neg  | neg     | neg |
| RV-NEG-34 | Rhino/Enterovirus | neg  | neg  | neg  | neg     | neg |
| RV-NEG-30 | Rhino/Enterovirus | 24.4 | 24.5 | 24.8 | 41800   | 4.6 |
| RV-NEG-31 | Rhino/Enterovirus | 21.8 | 22.0 | 22.1 | 286300  | 5.5 |
| RV-NEG-32 | Rhino/Enterovirus | 21.7 | 21.8 | 21.8 | 1492000 | 6.2 |
| RV-NEG-33 | Rhino/Enterovirus | 32.1 | 32.5 | 32.6 | 1300    | 3.1 |

|           |                   |      |      |      |         |     |
|-----------|-------------------|------|------|------|---------|-----|
| RV-NEG-34 | Rhino/Enterovirus | 27.4 | 27.7 | 27.7 | 86200   | 4.9 |
| RV-NEG-35 | Influenza A       | 24.0 | 24.1 | 24.2 | 136100  | 5.1 |
| RV-NEG-36 | Influenza A       | 23.1 | 23.3 | 23.3 | 385000  | 5.6 |
| RV-NEG-37 | Influenza A       | 24.4 | 24.5 | 24.7 | 117000  | 5.1 |
| RV-NEG-38 | Influenza A       | 25.5 | 25.6 | 26.0 | 62300   | 4.8 |
| RV-NEG-39 | Influenza A       | 24.6 | 24.6 | 24.7 | 119000  | 5.1 |
| RV-NEG-40 | Influenza A       | 25.2 | 25.3 | 25.5 | 50200   | 4.7 |
| RV-NEG-41 | Influenza B       | 22.5 | 22.6 | 22.7 | 200500  | 5.3 |
| RV-NEG-42 | Influenza B       | 23.3 | 23.5 | 23.5 | 78600   | 4.9 |
| RV-NEG-43 | Influenza B       | 22.7 | 22.8 | 29.2 | 136100  | 5.1 |
| RV-NEG-44 | Influenza B       | 24.6 | 24.8 | 24.9 | 30500   | 4.5 |
| RV-NEG-45 | Influenza B       | 24.0 | 24.0 | 24.1 | 50500   | 4.7 |
| RV-NEG-46 | Influenza B       | 23.7 | 24.2 | 25.3 | 33800   | 4.5 |
| RV-NEG-47 | RSV-A/B           | 20.1 | 20.2 | 20.4 | 3675800 | 6.6 |
| RV-NEG-48 | RSV-A/B           | 23.0 | 23.1 | 23.4 | 602500  | 5.8 |
| RV-NEG-49 | RSV-A/B           | 21.7 | 21.9 | 22.0 | 1464800 | 6.2 |
| RV-NEG-50 | RSV-A/B           | 24.9 | 25.0 | 25.1 | 139000  | 5.1 |
| RV-NEG-51 | RSV-A/B           | 21.8 | 22.2 | 22.2 | 891300  | 6.0 |
| RV-NEG-52 | RSV-A/B           | 24.9 | 24.9 | 25.4 | 104000  | 5.0 |
| RV-NEG-53 | Metapneumovirus   | 22.9 | 23.4 | 23.8 | 203900  | 5.3 |
| RV-NEG-54 | Metapneumovirus   | 22.4 | 22.6 | 22.9 | 339800  | 5.5 |
| RV-NEG-55 | Metapneumovirus   | 24.1 | 24.1 | 24.5 | 107700  | 5.0 |

**Supplementary Table S3.** Minimal threshold of detection for rapid antigen tests on serial dilution from positive samples of a cell culture supernatant and a positive clinical sample.

| <b>Manufacturer</b>              | <b>Name of antigen assay</b>                                 | <b>Cell culture super-natant</b> | <b>Positive clinical sample.</b> |
|----------------------------------|--------------------------------------------------------------|----------------------------------|----------------------------------|
| Acro Biotech                     | Acro COVID-19 Antigentest                                    | Failed                           | Passed                           |
| AMEDA Labordiagnostic            | AMP Rapid Test SARS-CoV-2 Ag                                 | Passed                           | Passed                           |
| Becton Dickinson                 | The BD Veritor™ System                                       | Passed                           | Passed                           |
| Beijing Hotgen Biotech Co., Ltd. | Novel Coronavirus 2019-nCoV<br>Antigen Test (Colloidal Gold) | Failed                           | Failed                           |
| BioNote, Co., LTD.               | NowCheck® COVID-19 Ag Test                                   | Passed                           | Passed                           |
| BIOSYNEX Swiss                   | Biosynex COVID-19 Ag BSS^<br>(colloidal gold)                | Passed                           | Passed                           |
| BIOSYNEX Swiss                   | Biosnyex COVID-19 Ag+ BSS°<br>(agglutin)                     | Passed                           | Passed                           |
| Biozek Medical                   | COVID-19 Antigen Rapid Test                                  | Passed                           | Failed                           |

|                                                 |                                                                            |        |        |
|-------------------------------------------------|----------------------------------------------------------------------------|--------|--------|
|                                                 | Cassette                                                                   |        |        |
| GenBody Inc.                                    | GenBody Covid-19 Ag                                                        | Failed | Passed |
| Green Cross Medical Science Corp.               | Genedia W COVID-19 Ag§                                                     | Failed | Failed |
| Guangzhou Wondfo Biotech Co.                    | Wondfo SARS-CoV-2 Antigen Test                                             | Failed | Passed |
| Hangzhou Clongene Biotech Co., Ltd.             | CLUNGENE® COVID-19 Rapid<br>Antigen Test Cassette                          | Passed | Passed |
| HANGZHOU LYSUN Biotechnology                    | LYSUN SARS-CoV-2 Antigen                                                   | Passed | Passed |
| Hangzhou Realy Tech Co.                         | REALY antigen test                                                         | Passed | Passed |
| Healgen Scientific Limited Liability<br>Company | CLINITEST®, Rapid COVID-19<br>Antigen Test+                                | Passed | Passed |
| Humasis                                         | Humasis COVID-19 Ag Test                                                   | Passed | Passed |
| Lansion Biotechnology Co.                       | Lansionbio® COVID-19 Antigen Test<br>Kit (Dry Fluorescence<br>Immunoassay) | Passed | Passed |
| Lepu Medical Zechnology Co., Ltd.               | SARS-CoV-2 Antigen Rapid Test<br>(Colloidal Gold)                          | Failed | Failed |



|                                            |                                                  |        |        |
|--------------------------------------------|--------------------------------------------------|--------|--------|
|                                            | Immunochromatography)                            |        |        |
| LumiraDx AB                                | LumiraDx SARS-CoV-2 Ag                           | Passed | Passed |
| MaiMed GmbH                                | MEDsan® SARS-CoV-2 Antigen<br>Rapid Test         | Passed | Passed |
| MP Biomedicals GmbH                        | MP COVID-19 Antigen Rapid Test                   | Passed | Passed |
| Newgene Hangzhou Bioengineering            | COVID-19 Antigen Detection Kit                   | Passed | Passed |
| Precision Biosensor, Inc.                  | Exdia COVID-19 Ag                                | Passed | Passed |
| PRIMA Lab SA                               | COVID-19 Antigen Rapid Test                      | Failed | Passed |
| Shenzhen Microprofit Biotech Co.           | Fluorecare® SARS-CoV-2 Spike<br>Protein Test Kit | Passed | Passed |
| Sugentech Inc.                             | SGTi-flex COVID-19 Ag                            | Passed | Passed |
| VivaCheck Biotech (Hangzhou) Co., Ltd      | VivaDiag™, SARS-CoV-2 Rapid Ag<br>Test           | Passed | Passed |
| Willi Fox                                  | Willi Fox COVID-19 Antigen Test®                 | Passed | Passed |
| Wuhan UNscience Biotechnology Co.,<br>Ltd. | SARS-CoV-2 Antigen Rapid Test Kit                | Passed | Failed |

|                                |                    |        |        |
|--------------------------------|--------------------|--------|--------|
| Xiamen Boson Biotech Co., Ltd. | Medicovid-AG® Test | Passed | Passed |
|--------------------------------|--------------------|--------|--------|

## Supplementary figures.

**Supplementary Figure S1.** Distribution of Ct values overall (A) and across all four laboratories (B).

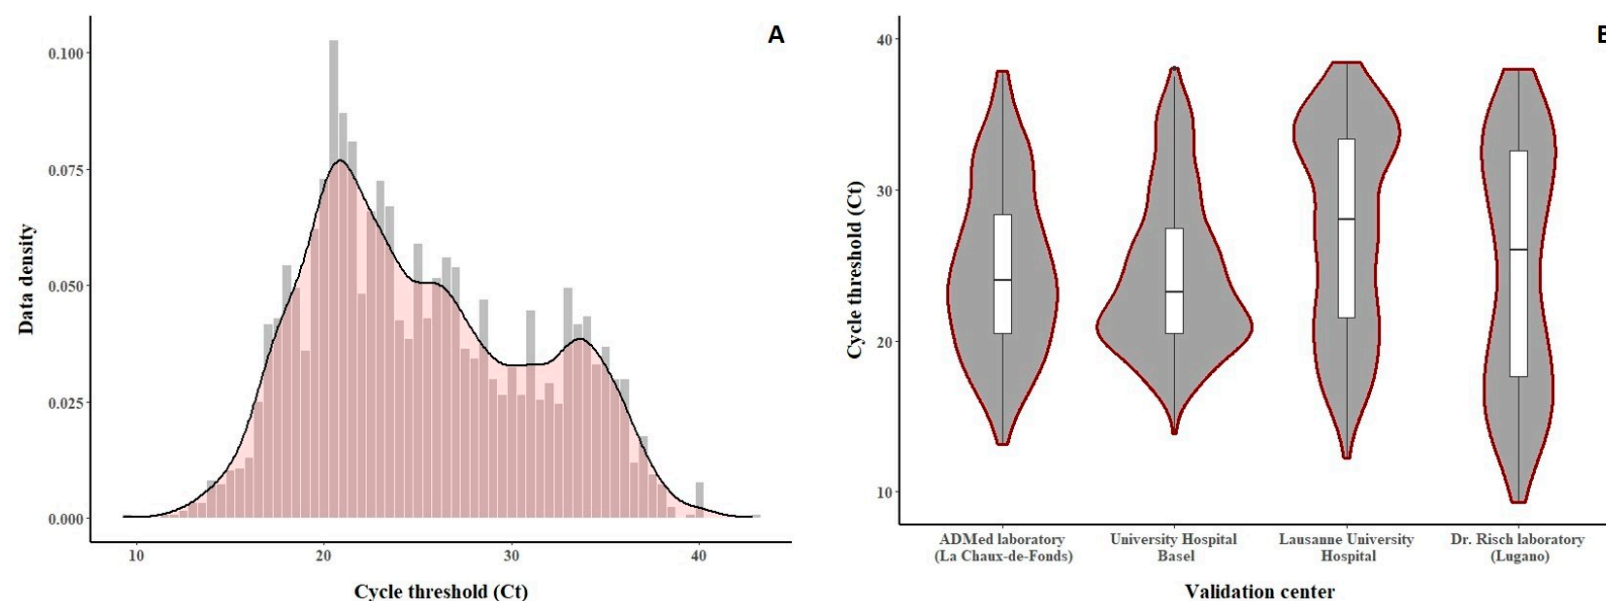

## Figure legend

**Supplementary Figure S1.** Histogram of cumulated Ct values obtained overall in the study. B. Violins represent the Ct distribution of values in each validation center; horizontal black lines represent the median Ct for each validation center.
